# Supplementary material
Source: PubMed Central journal article supplement (PMC2797832)
Supplement: NIHMS148469-supplement-Supp_Mat.pdf [file NIHMS148469-supplement-Supp_Mat.pdf]

**SUPPORTING INFORMATION****Supp. Methods****Mutation analysis for *SMCIA* gene**

DNA was extracted from peripheral blood lymphocytes by a standard non-organic extraction procedure. The entire *SMCIA* coding region was analysed for mutations in all patients by sequencing. Primer pairs were designed to amplify exons, exon/intron boundaries and short flanking intronic sequences. Amplified PCR products were purified (Qiagen) and sequenced. None of *SMCIA* mutations has been found in at least 100 control alleles.

**Supp. Table S1. Polymorphisms in the non coding regions of *SMCIA* gene**

| <b>Region</b> | <b>Nucleotide change</b> | <b>Reference</b>        |
|---------------|--------------------------|-------------------------|
| 5' UTR        | c.-19C>T                 | Deardorff et al. [2007] |
| Intron 1      | c.109+101delG            | NCBI                    |
| Intron 1      | c.109+102A>C             | NCBI                    |
| Intron 1      | c.109+2743G>A            | NCBI                    |
| Intron 1      | c.109+3295T>C            | NCBI                    |
| Intron 1      | c.110-2132G>A            | NCBI                    |
| Intron 1      | c.110-352G>A             | NCBI                    |
| Intron 1      | c.110-169G>A             | NCBI                    |
| Intron 3      | c.411+71C>G              | NCBI                    |
| Intron 7      | c.1254+52A>G             | NCBI                    |
| Intron 7      | c.1254+973T>G            | NCBI                    |
| Intron 7      | c.1255-370C>T            | NCBI                    |
| Intron 8      | c.1338-59C>T             | NCBI                    |
| Intron 8      | c.1338-32C>A             | Deardorff et al. [2007] |
| Intron 9      | c.1545+792A>T            | NCBI                    |
| Intron 9      | c.1545+1356A>T           | NCBI                    |
| Intron 9      | c.1545+1379C>T           | NCBI                    |
| Intron 9      | c.1545+1416G>T           | NCBI                    |
| Intron 9      | c.1546-1002T>C           | NCBI                    |
| Intron 9      | c.1546-489G>T            | NCBI                    |
| Intron 12     | c.2058+22T>G             | NCBI                    |
| Intron 12     | c.2058+28C>T             | NCBI                    |
| Intron 12     | c.2058+29A>T             | NCBI                    |
| Intron 13     | c.2197-11A>T             | This report             |
| Intron 13     | c.2197-5T>C              | NCBI                    |
| Intron 15     | c.2420+816G>A            | NCBI                    |
| Intron 15     | c.2420+828G>A            | NCBI                    |

| <b>Region</b> | <b>Nucleotide change</b> | <b>Reference</b> |
|---------------|--------------------------|------------------|
| Intron 16     | c.2562+1471C>T           | NCBI             |
| Intron 16     | c.2562+1477T>G           | NCBI             |
| Intron 16     | c.2562+1483T>C           | NCBI             |
| Intron 16     | c.2562+2010delT          | NCBI             |
| Intron 18     | c.2862+228C>T            | NCBI             |
| Intron 18     | c.2862+387C>A            | NCBI             |
| Intron 18     | c.2862+597C>T            | NCBI             |
| Intron 19     | c.2973+1188G>A           | NCBI             |
| Intron 19     | c.2973+3511C>T           | NCBI             |
| Intron 19     | c.2973+3642C>T           | NCBI             |
| Intron 19     | c.2973+4150G>A           | NCBI             |
| Intron 19     | c.2973+4515T>G           | NCBI             |
| Intron 19     | c.2973+5048delT          | NCBI             |
| Intron 19     | c.2973+5816G>C           | NCBI             |
| Intron 19     | c.2973+5950G>A           | NCBI             |
| Intron 19     | c.2973+6655A>G           | NCBI             |
| Intron 19     | c.2973+7619G>T           | NCBI             |
| Intron 19     | c.2974-2169T>G           | NCBI             |
| Intron 19     | c.2974-1096G>C           | NCBI             |
| Intron 20     | c.3130+183G>A            | NCBI             |
| Intron 22     | c.3438-94delA            | This report      |
| 3'UTR         | c.3702+315G>T            | NCBI             |
| 3'UTR         | c.3702+2443A>G           | NCBI             |
| 3'UTR         | c.3702+5016T>C           | NCBI             |

Numbering of mutations based on GenBank NM\_006306.2 with +1 as the A of the ATG start codon.
